# Supplementary material for: Association between Salivary Immune Markers and Oral Health Conditions in Pregnant Women
Source: Research Square preprint supplement (doi:10.21203/rs.3.rs-5968375/v1), 2025-04-14
Supplement: Supplementary file 1 [file bd8db91d7f18c394f3b4dd22.xlsx]

## Sheet: Perinatal oral health care
SubjectNumber	Age	Age>30	Race	Race_Black	Hispanic	YeastInfection	Antibiotics	Antifungal	BrushTwiceDaily	Prenatal_Inhaler	Prenatal_Diabetes	Prenatal_Asthma	Prenatal_Emotionalcondition	Prenatal_HTN	Prenatal_Smoking	Employed	Married	PI	DT	MT	FT	DMFT	DS	MS	FS	DMFS	ICDAS	Gestational age at V1	Lowbrithweight	InfantBirthweight	Depression_score>12	Cortisol	Cortisol LN	Estradiol	Estradiol LN	Progesterone	Progesterone LN	Testosterone	Testosterone LN	T3	T3 LN	T4	T4 LN	sCD40L	sCD40L LN	EGF	EGF LN	Eotaxin	Eotaxin LN
1	38	1	2	1	0	1	0	0	1	0	0	0	0	1	0	1	0	1	2	2	5	9	2	10	5	17	6.25	28.1429	0	2864	1	1.04	0.0392207	440	6.08677	7320	8.89837	530	6.27288	100	4.60517	30	3.4012	168.45	5.12664	4293.43	8.36484	6.16	1.81808
2	26	0	3	0	1	0	0	0	1	0	0	0	0	0	0	1	0	1.83	2	9	6	17	8	25	15	48	6.55	36.2857	0	3743	0	8.54	2.14476	1740	7.46164	20140	9.91046	760	6.63332	840	6.7334	30	3.4012	55.84	4.02249	821.43	6.71105	6.16	1.81808
3	25	0	3	0	1	0	0	0	1	1	0	1	0	0	0	1	0	1	0	0	6	6	0	0	10	10	0	27.2857	0	3147	0	7.76	2.04898	3270	8.09255	26960	10.2021	5020	8.52119	5630	8.63586	2870	7.96207	13	2.56495	663.35	6.4973	3	1.09861
4	35	1	2	1	0	0	0	0	1	0	0	0	0	0	0	1	1	1.21	1	0	0	1	1	0	0	1	3	36.2857	0	3176	1	5.32	1.67147	720	6.57925	14040	9.54967	540	6.29157	510	6.23441	120	4.78749	69.86	4.24649	4560.72	8.42524	8.45	2.13417
5	24	0	1	0	0	0	1	0	1	0	0	0	0	0	0	0	0	0.36	0	0	4	4	0	0	4	4	0	34.2857	0	3658	0	9.12	2.21047	1910	7.55486	20820	9.94367	1940	7.57044	1490	7.30653	1000	6.90776	40.24	3.69486	1340.82	7.20104	12.74	2.54475
6	31	1	2	1	0	0	0	0	1	0	0	0	0	0	0	1	0	1.56	15	1	1	16	38	5	1	44	4.67	36	0	3799	0	20.34	3.01259	1950	7.57558	33390	10.416	3780	8.23748	3820	8.24801	1570	7.35883	13	2.56495	255.57	5.5435	7.38	1.99877
7	33	1	1	0	0	1	0	0	0	1	0	1	0	0	1	0	0	3	10	5	1	16	14	25	3	42	5.79	36	0	3889	1	2.95	1.08181	300	5.70378	12740	9.4525	620	6.42972	180	5.19296	110	4.70048	69.86	4.24649	1203.34	7.09286	13.47	2.60046
8	22	0	2	1	0	0	0	0	1	0	0	0	0	0	0	0	0	2.21	5	0	0	5	5	0	0	5	2.6	37.8571	0	3156	0	25.71	3.24688	4110	8.32118	50470	10.8291	5950	8.69115	6660	8.80387	2360	7.76642	187.02	5.23122	820.42	6.70982	17.39	2.8559
9	20	0	2	1	0	0	0	0	1	0	0	0	0	1	0	0	0	1.36	8	0	0	8	10	0	0	10	1.3	39	0	3147	1	6.84	1.92279	1320	7.18539	12570	9.43907	1150	7.04752	900	6.80239	30	3.4012	21.63	3.07408	891.58	6.793	4.71	1.54969
10	26	0	2	1	0	0	0	0	0	0	0	0	0	0	0	1	0	1.07	8	0	0	8	8	0	0	8	2.25	33.4286	0	3516	0	8.11	2.0931	860	6.75693	14670	9.59356	840	6.7334	630	6.44572	470	6.15273	40.24	3.69486	388.61	5.96258	4.71	1.54969
11	26	0	2	1	0	1	0	0	0	0	0	0	0	0	0	1	0	1.36	3	0	0	3	4	0	0	4	2.5	35.7143	0	3176	0	5.18	1.64481	1010	6.91771	15790	9.66713	1480	7.2998	1320	7.18539	350	5.85793	40.24	3.69486	1264.74	7.14262	4.71	1.54969
12	29	0	1	0	0	0	0	0	1	0	0	0	0	0	0	0	0	2.21	5	0	1	6	5	0	2	7	3.4	27.7143	0	3828	0	3.54	1.26413	440	6.08677	9510	9.1601	750	6.62007	680	6.52209	30	3.4012	69.86	4.24649	1985.84	7.5938	4.71	1.54969
13	21	0	2	1	0	0	0	0	1	0	0	0	0	0	0	0	0	1.29	5	0	0	5	6	0	0	6	2	38.1429	0	3714	1	17.94	2.88703	9270	9.13454	78260	11.2678	8630	9.063	8790	9.08137	4010	8.29655	82.83	4.41679	639.96	6.46141	16.16	2.78254
14	30	0	2	1	0	0	0	0	0	0	0	0	0	0	0	1	0	2.4	0	3	1	4	0	15	2	17	7	30.5714	0	3289	0	3.46	1.24127	1090	6.99393	15990	9.67972	1530	7.33302	1440	7.2724	1110	7.01212	13	2.56495	555.2	6.31933	3	1.09861
15	27	0	2	1	0	1	0	1	0	0	0	0	0	0	1	0	0	1.76	5	3	2	10	5	15	5	25	6.05	34.8571	0	3091	1	5.75	1.7492	650	6.47697	30400	10.3222	1190	7.08171	1180	7.07327	1550	7.34601	21.63	3.07408	611.2	6.41542	4.71	1.54969
16	22	0	2	1	0	0	0	0	0	0	0	0	0	0	0	1	0	2.05	3	0	0	3	3	0	0	3	2	37.2857	0	2609	1	3.37	1.21491	400	5.99146	5840	8.67249	570	6.34564	30	3.4012	30	3.4012	196.04	5.27832	607.99	6.41016	27.97	3.33113
17	29	0	1	0	0	1	0	0	1	0	0	0	0	0	0	1	0	1.3	1	1	2	4	1	5	3	9	6.17	36.5714	0	3289	1	10.06	2.30857	410	6.01616	40750	10.6152	500	6.21461	10	2.30259	30	3.4012	69.86	4.24649	1244.77	7.12671	21.81	3.08237
19	24	0	2	1	0	1	0	1	1	0	1	0	0	1	0	1	0	1.18	6	1	1	8	11	5	4	20	3	27.8571	0	2858	1	10.53	2.35423	720	6.57925	8500	9.04782	1940	7.57044	1210	7.09838	30	3.4012	13	2.56495	499.91	6.21443	3	1.09861
20	22	0	2	1	0	0	0	0	0	0	0	0	0	0	0	0	0	2.18	9	0	2	11	9	0	3	12	3	36.5714	0	2532	0	10.05	2.30757	1490	7.30653	34640	10.4528	1720	7.45008	1700	7.43838	860	6.75693	13	2.56495	408.54	6.01259	3	1.09861
21	21	0	1	0	0	1	0	0	0	0	0	0	1	0	1	0	0	2.21	0	0	2	2	0	0	2	2	0	33.2857	0	3235	0	9.17	2.21594	310	5.73657	13330	9.49777	590	6.38012	230	5.43808	220	5.39363	95.05	4.5544	1212.75	7.10065	6.16	1.81808
22	26	0	1	0	1	1	0	0	1	0	1	1	0	0	0	0	0	1.75	0	0	14	14	0	0	24	24	0	31.2857	0	3573	0	3.39	1.22083	750	6.62007	27710	10.2295	570	6.34564	460	6.13123	30	3.4012	168.45	5.12664	2058.97	7.62996	30.96	3.4327
23	23	0	3	0	0	0	0	0	1	0	0	0	0	0	0	0	1	2.36	2	0	5	7	4	0	5	9	4.25	33.2857	0	3176	1	12.37	2.51527	1230	7.11477	27660	10.2277	2030	7.61579	1750	7.46737	1140	7.03878	13	2.56495	762.33	6.63638	4.71	1.54969
24	26	0	2	1	0	0	0	0	1	0	0	0	0	0	0	1	0	1.64	11	0	0	11	38	0	0	38	5.21	29.8571	0	2835	1	9.46	2.24707	1020	6.92756	26670	10.1913	1830	7.51207	1780	7.48437	800	6.68461	82.83	4.41679	260.05	5.56087	10.33	2.33505
25	26	0	2	1	0	1	0	0	0	1	0	1	1	0	0	0	0	1.21	4	0	2	6	9	0	4	13	2	36.7143	0	3459	0	5.28	1.66393	1140	7.03878	37680	10.5369	660	6.49224	80	4.38203	30	3.4012	106.67	4.66974	1252.57	7.13295	20.76	3.03303
26	31	1	2	1	0	1	0	0	1	0	0	0	0	0	0	1	0	1.25	6	4	3	13	10	20	6	36	6.03	28.1429	0	2524	0	9.85	2.28747	1120	7.02108	40880	10.6184	1630	7.39634	1950	7.57558	1630	7.39634	21.63	3.07408	1128.55	7.02869	7.38	1.99877
27	31	1	2	1	0	0	0	0	0	0	0	0	0	1	0	1	0	1.29	2	0	0	2	6	0	0	6	5.33	32.2857	0	3006	0	11.2	2.41591	2720	7.90839	30780	10.3346	3610	8.19146	3760	8.23217	1440	7.2724	13	2.56495	248.21	5.51428	4.71	1.54969
28	33	1	3	0	1	0	0	0	1	0	1	0	0	1	0	0	0	1.14	0	2	12	14	0	10	13	23	7	35	0	3431	0	17.21	2.84549	1850	7.52294	20150	9.91096	3480	8.15479	3170	8.06149	2330	7.75362	13	2.56495	268.97	5.5946	3	1.09861
29	31	1	2	1	0	0	0	0	0	0	0	0	0	0	0	0	0	1.87	5	0	0	5	7	0	0	7	5.14	38	0	2921	1	10.25	2.32728	1160	7.05618	19030	9.85377	690	6.53669	650	6.47697	30	3.4012	63	4.14313	1509.54	7.31956	21.29	3.05824
31	20	0	1	0	0	0	1	0	0	0	0	0	0	0	0	1	0	2.36	2	0	1	3	2	0	1	3	2	34.8571	0	3619	1	9.46	2.24707	1030	6.93731	10100	9.22029	570	6.34564	40	3.68888	30	3.4012	69.86	4.24649	818.41	6.70736	25.24	3.22843
32	22	0	3	0	0	0	0	0	1	0	0	0	0	0	0	0	1	2.46	2	2	1	5	2	10	1	13	6.17	38.1429	0	3374	1	4.33	1.46557	1120	7.02108	33660	10.4241	2530	7.83597	230	5.43808	30	3.4012	168.45	5.12664	409.73	6.0155	17.98	2.88926
33	21	0	2	1	0	0	0	0	1	0	0	0	0	0	0	1	0	1.56	4	3	4	11	6	15	7	28	6.14	29.2857	0	3374	1	10.88	2.38693	1400	7.24423	14970	9.6138	700	6.55108	350	5.85793	550	6.30992	117.81	4.76907	898.09	6.80027	9.42	2.24284
34	27	0	3	0	0	0	0	0	0	1	0	1	1	0	0	0	0	2.36	8	0	0	8	8	0	0	8	2	35.2857	0	3317	1	7.15	1.96711	460	6.13123	10230	9.23308	860	6.75693	180	5.19296	30	3.4012	55.84	4.02249	570.85	6.34713	3	1.09861
35	20	0	3	0	1	0	0	0	1	0	0	0	0	0	0	1	0	1.82	0	0	5	5	0	0	21	21	0	28.4286	0	3034	1	11.32	2.42657	480	6.17379	6250	8.74034	530	6.27288	10	2.30259	30	3.4012	55.84	4.02249	901.9	6.8045	18.56	2.92101
36	40	1	3	0	0	1	0	1	1	0	0	0	1	0	0	0	0	1.96	6	4	0	10	7	20	0	27	6.15	31.1429	0	2949	1	1.77	0.57098	620	6.42972	19070	9.85587	1640	7.40245	1490	7.30653	1170	7.06476	13	2.56495	395.05	5.97901	3	1.09861
37	29	0	3	0	0	0	0	0	1	0	0	0	0	0	0	0	1	0.5	0	0	6	6	0	0	12	12	0	28.5714	0	3629	0	17	2.83321	990	6.8977	14540	9.58466	1440	7.2724	840	6.7334	230	5.43808	13	2.56495	972.63	6.88	7.93	2.07065
38	31	1	3	0	0	0	0	0	1	0	0	0	0	0	1	1	0	1.46	3	2	4	9	3	10	8	21	5.85	34	0	3261	0	11.07	2.40424	850	6.74524	8310	9.02521	1740	7.46164	1520	7.32647	970	6.8773	13	2.56495	252.35	5.53082	3	1.09861
39	33	1	1	0	0	0	0	0	0	0	0	0	1	0	0	0	1	2.4	5	0	0	5	5	0	0	5	3.4	38.8571	1	2478	0	5.64	1.72988	620	6.42972	3160	8.05833	530	6.27288	10	2.30259	30	3.4012	138.93	4.93397	4083.45	8.3147	24.77	3.20963
40	31	1	2	1	0	0	0	0	1	0	0	0	1	0	0	0	1	1.46	2	4	0	6	2	20	0	22	6.55	31.1429	0	3884	0	5.35	1.6771	570	6.34564	11330	9.33521	1680	7.42655	370	5.9135	2140	7.66856	82.83	4.41679	405.04	6.00399	3	1.09861
41	27	0	2	1	0	0	0	0	1	0	0	0	0	0	0	1	0	1.44	15	3	3	21	53	15	10	78	5.31	35.8571	0	2721	0	14.38	2.66584	2460	7.80792	21510	9.97627	2480	7.81601	1380	7.22984	620	6.42972	13	2.56495	359.15	5.88374	3	1.09861
42	31	1	3	0	0	0	0	0	0	0	1	0	1	1	1	0	0	1.57	3	0	0	3	5	0	0	5	3.6	34.2857	0	3289	1	6.42	1.85942	820	6.7093	6720	8.81284	700	6.55108	3180	8.06464	370	5.9135	55.84	4.02249	274.42	5.61466	3	1.09861
43	28	0	3	0	0	0	0	0	1	0	0	0	1	0	0	1	1	2.28	1	1	9	11	1	5	19	25	6.3	29	0	3884	1	6.13	1.81319	770	6.64639	6360	8.75778	590	6.38012	90	4.49981	30	3.4012	95.05	4.5544	643.62	6.46711	9.42	2.24284
44	25	0	2	1	0	1	0	1	1	0	0	0	0	1	0	1	1	1.67	2	1	0	3	4	5	0	9	5.89	30.5714	0	3034	1	3.06	1.11841	610	6.41346	7260	8.89014	1310	7.17778	610	6.41346	350	5.85793	55.84	4.02249	1261.76	7.14026	3.82	1.34025
45	21	0	2	1	0	0	0	0	0	0	0	0	0	0	0	1	0	1.96	1	0	7	8	1	0	13	14	3	34	0	2580	0	9.62	2.26384	670	6.50728	5650	8.63941	630	6.44572	10	2.30259	30	3.4012	95.05	4.5544	941.37	6.84734	25.71	3.24688
46	36	1	3	0	0	1	0	0	0	0	0	0	1	0	1	0	0	1.68	0	0	5	5	0	0	5	5	0	36.7143	0	3184	1	7.69	2.03992	1300	7.17012	15210	9.62971	790	6.67203	310	5.73657	30	3.4012	40.24	3.69486	463.33	6.13844	4.71	1.54969
47	27	0	2	1	0	1	0	0	1	0	0	0	0	0	0	0	0	1.21	0	0	2	2	0	0	2	2	0	36	0	3513	0	8.06	2.08691	1160	7.05618	11200	9.32367	1620	7.39018	1170	7.06476	980	6.88755	13	2.56495	830.44	6.72196	4.71	1.54969
48	30	0	2	1	0	0	0	0	1	0	0	0	0	1	0	0	1	2.14	4	1	2	7	5	5	2	12	4.5	28.5714	1	2444	0	5.84	1.76473	670	6.50728	21110	9.9575	1650	7.40853	1390	7.23706	840	6.7334	21.63	3.07408	734.46	6.59914	4.71	1.54969
49	18	0	1	0	0	0	0	0	0	0	0	0	0	0	0	0	0	3	8	0	0	8	14	0	0	14	3.5	35.4286	0	3743	1	11.28	2.42303	840	6.7334	4570	8.42727	740	6.60665	50	3.91202	30	3.4012	21.63	3.07408	400.06	5.99161	15.52	2.74213
50	28	0	2	1	0	0	0	0	1	0	0	0	0	0	0	0	0	1.38	2	2	0	4	2	10	0	12	6.33	31.7143	0	3346	1	4.93	1.59534	290	5.66988	2900	7.97247	570	6.34564	40	3.68888	30	3.4012	13	2.56495	637.39	6.45738	8.95	2.19165
51	41	1	2	1	0	0	0	0	1	0	0	0	0	0	0	1	1	1.77	3	2	2	7	3	10	2	15	5.9	34	0	3405	1	2.68	0.985817	1770	7.47873	20030	9.90499	640	6.46147	10	2.30259	30	3.4012	106.67	4.66974	809.4	6.69629	7.38	1.99877
52	28	0	1	0	0	0	0	0	1	0	0	0	1	0	1	0	0	1.32	2	0	0	2	2	0	0	2	3	31	0	3629	0	37.12	3.61416	1520	7.32647	10800	9.2873	1980	7.59085	1660	7.41457	1090	6.99393	13	2.56495	327.02	5.79002	3	1.09861
53	27	0	2	1	1	1	0	1	1	0	0	0	1	0	0	1	0	1.62	2	2	3	7	3	10	2	15	6.08	34.1429	0	3402	0	9.59	2.26072	1450	7.27932	18020	9.79924	2110	7.65444	1660	7.41457	1000	6.90776	13	2.56495	623.58	6.43548	3	1.09861
54	24	0	3	0	1	0	0	0	1	0	0	0	0	0	0	1	1	2.38	2	4	0	6	2	20	0	22	6.55	39.4286	0	3374	1	6.78	1.91398	930	6.83518	14260	9.56521	2580	7.85554	2020	7.61085	1380	7.22984	13	2.56495	1367.29	7.22059	8.45	2.13417
55	27	0	2	1	0	0	0	0	0	0	0	0	0	0	1	0	0	1.62	2	2	8	12	2	10	8	20	6.45	33.5714	0	3317	1	5.61	1.72455	1100	7.00307	15160	9.62642	1740	7.46164	1760	7.47307	60	4.09434	40.24	3.69486	610.23	6.41384	7.38	1.99877
56	28	0	2	1	0	0	0	0	1	0	0	0	1	0	0	1	0	2.3	10	1	7	18	10	5	17	32	3.6	28.5714	0	3119	1	7.96	2.07443	1580	7.36518	22110	10.0038	3120	8.04559	3010	8.0097	2340	7.75791	40.24	3.69486	609.91	6.41331	8.45	2.13417
57	34	1	1	0	0	1	0	0	0	1	1	1	0	1	0	0	1	1.52	6	2	1	9	7	15	1	23	5.41	36.7143	0	3969	0	10.23	2.32532	1210	7.09838	9470	9.15588	2540	7.83992	1760	7.47307	710	6.56526	13	2.56495	128.64	4.85702	3	1.09861
58	28	0	1	0	1	1	0	1	0	0	0	0	1	0	1	1	0	2.55	3	2	0	5	3	10	0	13	6.08	38	0	3289	0	16.82	2.82257	1050	6.95655	10440	9.2534	880	6.77992	290	5.66988	270	5.59842	13	2.56495	86.98	4.46568	6.16	1.81808
59	30	0	2	1	0	0	0	0	1	0	0	1	0	0	0	1	0	2.4	5	1	3	9	7	5	5	17	4.08	28.5714	0	3034	0	7.66	2.03601	940	6.84588	19640	9.88532	590	6.38012	60	4.09434	3710	8.21879	95.05	4.5544	226.08	5.42089	13.47	2.60046
60	29	0	3	0	1	0	0	0	0	0	0	0	1	0	0	0	0	1.5	4	0	2	6	4	0	2	6	3	32.7143	0	3181	0	13.15	2.57642	1600	7.37776	23010	10.0437	1590	7.37149	1600	7.37776	470	6.15273	21.63	3.07408	367.85	5.90768	8.45	2.13417
61	26	0	2	1	0	0	0	0	0	0	0	0	0	0	0	1	0	2.5	0	0	0	0	0	0	0	0	0	35	0	3396	1	6.34	1.84688	1210	7.09838	19400	9.87303	1310	7.17778	730	6.59304	640	6.46147	13	2.56495	871.89	6.77066	6.16	1.81808
62	33	1	2	1	0	1	0	0	1	0	0	0	1	0	0	1	0	1.5	2	0	2	4	2	0	2	4	2	31.4286	0	3147	0	3.77	1.32708	710	6.56526	6370	8.75935	1060	6.96602	620	6.42972	720	6.57925	158.86	5.06802	2270.38	7.7277	14.86	2.69867
63	29	0	1	0	0	0	0	0	0	0	0	0	0	0	0	0	0	3	1	1	10	12	1	5	10	16	5.47	33.5714	0	2722	0	20.82	3.03591	1690	7.43248	27460	10.2205	3430	8.14032	4110	8.32118	2100	7.64969	13	2.56495	294.49	5.68525	3	1.09861
64	22	0	2	1	0	0	0	0	1	0	0	0	0	0	0	1	0	2	0	0	11	11	0	0	11	11	4	35.2857	0	4389	1	11.43	2.43624	5340	8.58298	36850	10.5146	4540	8.42068	4630	8.44031	2610	7.86711	21.63	3.07408	549.8	6.30955	7.38	1.99877
65	26	0	2	1	0	0	0	0	0	0	0	0	0	0	1	0	0	2	0	1	4	5	0	5	4	9	7	35.1429	0	2665	1	5.55	1.7138	840	6.7334	12430	9.42787	1140	7.03878	780	6.65929	770	6.64639	21.63	3.07408	306.09	5.72388	3	1.09861
66	25	0	1	0	1	0	0	0	0	0	0	0	1	0	0	0	0	2	7	1	1	9	7	5	1	13	4.83	32.7143	0	4304	0	10.78	2.37769	3500	8.16052	48540	10.7901	9250	9.13238	9260	9.13346	4290	8.36404	13	2.56495	125.22	4.83007	3	1.09861
67	24	0	2	1	0	0	0	0	1	0	0	0	0	0	0	0	0	2	5	0	2	7	5	0	2	7	3.2	37.2857	0	3601	0	15.19	2.72064	1200	7.09008	49750	10.8148	780	6.65929	80	4.38203	30	3.4012	69.86	4.24649	195.29	5.27449	7.38	1.99877
68	28	0	2	1	0	0	0	0	1	0	0	1	1	0	0	1	0	1.54	4	0	0	4	8	0	0	8	4.13	33.2857	0	3147	1	6.51	1.87334	1320	7.18539	7050	8.86078	620	6.42972	10	2.30259	30	3.4012	13	2.56495	543.99	6.29893	6.79	1.91545
69	23	0	1	0	0	0	0	0	0	0	0	0	0	0	0	0	0	2	2	0	2	4	2	0	2	4	3	37	0	3602	0	18.62	2.92424	1820	7.50659	22110	10.0038	3900	8.26873	3280	8.0956	1420	7.25841	9.36	2.23645	472.79	6.15865	6.16	1.81808
70	32	1	2	1	0	0	0	0	0	1	0	1	1	1	0	1	0	1.3	1	2	1	4	1	10	1	12	6.64	35.8571	0	3068	1	19.22	2.95595	3040	8.01961	34610	10.4519	6490	8.77802	5350	8.58485	3380	8.12563	13	2.56495	823.65	6.71375	3	1.09861
71	28	0	3	0	0	0	0	0	1	0	0	0	0	0	0	1	1	3	5	1	2	8	5	5	2	12	5.1	35.8571	0	3062	0	6.07	1.80336	420	6.04025	14310	9.56871	660	6.49224	220	5.39363	880	6.77992	263.22	5.57299	546.37	6.3033	20.5	3.02042
72	20	0	2	1	0	0	0	0	1	0	0	0	1	0	0	0	0	1.64	0	0	4	4	0	0	4	4	0	29.2857	0	3115	1	16.98	2.83204	2060	7.63046	34560	10.4505	4300	8.36637	5500	8.6125	3920	8.27385	40.24	3.69486	382.03	5.9455	13.47	2.60046
73	22	0	1	0	1	0	0	0	0	1	1	1	1	1	0	0	1	1.64	3	0	1	4	3	0	1	4	3.67	39.2857	0	3595	0	5.13	1.63511	790	6.67203	28330	10.2517	630	6.44572	310	5.73657	30	3.4012	200.48	5.30071	799.58	6.68409	16.78	2.82019
74	30	0	1	0	1	1	0	1	0	1	0	1	1	1	1	0	0	1.64	0	28	0	28	0	128	0	128	7	36.7143	0	2624	0	77.08	4.34484	7580	8.93327	78850	11.2753	15100	9.62245	17040	9.74332	9950	9.20533	693.6	6.5419	123.58	4.81689	94.51	4.54871
75	21	0	2	1	0	0	0	0	1	0	0	0	0	0	0	0	0	0.75	0	0	4	4	0	0	4	4	0	32.2857	0	2541	1	15.13	2.71668	1100	7.00307	11180	9.32188	1260	7.13887	900	6.80239	660	6.49224	13	2.56495	267.33	5.58848	3	1.09861
76	23	0	2	1	0	1	0	0	1	0	0	0	1	0	0	0	0	0.86	0	0	1	1	0	0	1	1	0	34.7143	0	3941	1	6.19	1.82294	1320	7.18539	22030	10.0002	1230	7.11477	1210	7.09838	1680	7.42655	13	2.56495	387.99	5.96098	3	1.09861
77	25	0	2	1	0	0	0	0	1	0	0	0	0	0	0	0	1	2	3	0	13	16	3	0	25	28	2	38	0	3294	1	10.66	2.3665	1120	7.02108	36510	10.5053	1240	7.12287	700	6.55108	1490	7.30653	117.81	4.76907	323.69	5.77979	7.38	1.99877
78	24	0	1	0	0	0	0	0	0	0	0	0	0	0	0	0	0	1.61	2	1	6	9	3	5	15	23	6.25	35.7143	0	2807	1	15.37	2.73242	1910	7.55486	26620	10.1894	2650	7.88231	2770	7.9266	950	6.85646	13	2.56495	395.24	5.97949	3	1.09861
79	21	0	2	1	0	1	0	0	1	0	0	0	0	0	0	1	0	1.21	0	0	9	9	0	0	13	13	0	29	0	3585	0	9.13	2.21157	1060	6.96602	16980	9.73979	1390	7.23706	1910	7.55486	30	3.4012	38.42	3.64858	595.32	6.3891	12.66	2.53845
80	28	0	2	1	0	0	0	0	1	0	0	0	0	0	0	0	0	2	0	1	0	1	0	5	0	5	7	36.8571	0	3629	1	5	1.60944	440	6.08677	14380	9.57359	800	6.68461	660	6.49224	610	6.41346	108.81	4.6896	2382.4	7.77586	12.66	2.53845
81	28	0	1	0	0	0	0	0	1	0	0	0	0	1	0	1	0	1	4	0	2	6	4	0	2	6	3	34.5714	1	1444	0	10.05	2.30757	410	6.01616	8110	9.00085	430	6.06379	10	2.30259	30	3.4012	71.41	4.26844	1967.06	7.5843	19.44	2.96733
82	42	1	1	0	0	0	0	0	0	0	0	0	0	0	1	1	0	1.4	1	1	8	10	2	5	15	22	6.71	31	0	2745	1	6.81	1.91839	600	6.39693	22560	10.0239	550	6.30992	780	6.65929	440	6.08677	125.95	4.83589	1562.49	7.35404	30.41	3.41477
83	30	0	2	1	0	1	1	0	1	1	0	1	0	0	0	1	0	2	1	0	12	13	1	0	12	13	3.8	34	0	3686	0	5.37	1.68083	680	6.52209	8050	8.99343	200	5.29832	60	4.09434	590	6.38012	9.25	2.22462	1275.24	7.15089	8.58	2.14943
84	28	0	2	1	0	0	0	0	1	0	0	0	0	0	0	1	0	1.68	1	0	7	8	1	0	7	8	2	31.4286	0	3829	0	2.51	0.920283	410	6.01616	4510	8.41405	40	3.68888	10	2.30259	30	3.4012	117.48	4.76627	1979.73	7.59072	27.35	3.30872
85	38	1	2	1	0	0	0	0	0	0	0	0	1	0	0	1	0	2.27	8	6	0	14	8	26	0	34	6.12	38.4286	0	3206	0	5.36	1.67896	820	6.7093	9920	9.20231	1010	6.91771	950	6.85646	140	4.94164	99.91	4.60427	2483.73	7.81752	11.43	2.43624
86	43	1	2	1	0	0	0	0	1	0	0	0	0	0	0	0	1	1.76	2	3	1	6	2	15	1	18	6.65	33.7143	0	3629	1	5.73	1.74572	580	6.36303	40130	10.5999	370	5.9135	160	5.07517	530	6.27288	231	5.44242	2522.95	7.83318	11.43	2.43624
87	24	0	2	1	0	0	0	0	1	0	0	0	0	0	0	0	1	1.71	0	0	6	6	0	0	6	6	0	29.2857	0	3686	1	4.66	1.53902	240	5.48064	5460	8.6052	180	5.19296	50	3.91202	30	3.4012	104.39	4.64813	1021.61	6.92914	12.66	2.53845
88	29	0	2	1	0	0	0	0	0	0	0	0	0	0	0	1	1	2	4	2	3	9	4	10	3	17	5.86	29	0	2766	1	4.56	1.51732	240	5.48064	3530	8.16905	490	6.19441	730	6.59304	30	3.4012	71.5236	4.27003	1031.98	6.93924	14.0983	2.64606
89	32	1	3	0	0	0	0	0	0	0	0	0	0	0	0	1	0	1.75	7	4	0	11	7	20	0	27	5.96	38.2857	0	3352	1	5.75	1.7492	680	6.52209	15040	9.61847	910	6.81344	970	6.8773	460	6.13123	197.723	5.28686	489.02	6.1924	29.5197	3.38506
90	20	0	1	0	0	0	0	0	0	0	0	0	1	0	0	0	0	2	1	0	2	3	1	0	2	3	3	37.4286	0	3050	1	5.16	1.64094	260	5.56068	10810	9.28823	10	2.30259	10	2.30259	30	3.4012	152.102	5.02455	1881.04	7.53958	81.485	4.40042
91	34	1	2	1	0	0	0	0	0	1	0	0	1	1	0	0	0	1.84	2	3	5	10	2	15	5	22	6.71	34.1429	1	2170	0	5.93	1.78002	560	6.32794	13890	9.53892	370	5.9135	400	5.99146	30	3.4012	118.386	4.77395	814.316	6.70235	20.5739	3.02402
92	23	0	2	1	0	0	0	0	0	0	0	0	0	0	0	1	0	1	0	0	2	2	0	0	2	2	2	28.1429	0	3544	0	6.81	1.91839	860	6.75693	13360	9.50002	2030	7.61579	3360	8.1197	2990	8.00303	97.7646	4.58256	641.193	6.46333	35.0787	3.55759
93	25	0	1	0	0	0	0	0	1	0	1	0	0	0	0	0	0	3	27	1	4	28	48	4	2	54	3.85	33.7143	0	4735	0	9.05	2.20276	1240	7.12287	9730	9.18297	450	6.10925	640	6.46147	230	5.43808	153.575	5.03419	653.806	6.48281	15.078	2.71324
94	36	1	1	0	0	0	0	0	1	0	0	0	1	0	0	1	0	2	0	1	10	11	0	5	10	15	4.8	35.1429	0	4168	0	6.62	1.8901	500	6.21461	20170	9.91195	400	5.99146	10	2.30259	70	4.2485	144.565	4.97373	4789.37	8.47415	24.8858	3.2143
95	24	0	2	1	0	0	0	0	1	0	0	0	1	0	0	1	0	2	3	0	1	4	3	0	2	5	4.2	32.7143	0	4026	1	6.06	1.80171	490	6.19441	11530	9.35271	440	6.08677	580	6.36303	290	5.66988	113.725	4.73379	1760.67	7.47345	10.2329	2.3256
96	32	1	2	1	0	1	0	1	1	0	0	0	0	0	0	0	0	2	3	1	1	5	3	5	1	9	5.13	28.4286	0	3517	1	5.38	1.68269	270	5.59842	5400	8.59415	410	6.01616	290	5.66988	30	3.4012	61.2492	4.11495	1023.37	6.93085	14.5969	2.68081
97	24	0	1	0	0	0	0	0	0	0	0	0	1	0	1	1	0	2	4	0	0	4	5	0	0	5	3	31.8571	0	3771	0	4.9	1.58924	370	5.9135	16710	9.72376	910	6.81344	1030	6.93731	830	6.72143	286.02	5.65606	707.733	6.56207	35.5752	3.57165
98	19	0	3	0	0	0	0	0	1	0	0	0	1	0	0	1	0	1	0	0	0	0	0	0	0	0	0	32.7143	0	3629	0	6.32	1.84372	1570	7.35883	50820	10.836	2560	7.84776	4190	8.34046	3820	8.24801	458.439	6.12783	393.952	5.97623	74.872	4.31578
99	22	0	2	1	0	0	0	0	0	0	0	0	0	0	0	0	0	1	3	0	0	3	3	0	0	3	3	31.7143	0	2921	1	1.07	0.0676586	250	5.52146	6900	8.83928	10	2.30259	10	2.30259	30	3.4012	168.509	5.12699	2365.64	7.7688	30.2884	3.41076
100	39	1	3	0	1	0	0	0	1	1	0	1	0	0	1	1	0	2	2	13	0	15	2	62	0	64	6.86	36.7143	0	2567	0	16	2.77259	2450	7.80384	19190	9.86214	2000	7.6009	1880	7.53903	1150	7.04752	358.677	5.88242	389.898	5.96589	42.2265	3.74305
101	24	0	2	1	1	0	0	0	1	0	0	0	0	0	0	1	0	2	4	2	2	8	4	10	2	16	5.5	28.4286	0	3261	0	7.02	1.94876	200	5.29832	3230	8.08024	10	2.30259	10	2.30259	30	3.4012	126.173	4.83766	1279.26	7.15404	22.3829	3.1083
102	29	0	3	0	0	0	0	0	1	0	0	0	0	0	0	0	1	0.29	0	0	1	1	0	0	1	1	0	27.7143	0	3261	1	3.99	1.38379	550	6.30992	7560	8.93063	1060	6.96602	1440	7.2724	1050	6.95655	154.868	5.04257	739.377	6.60581	29.5671	3.38666
103	38	1	3	0	0	0	0	0	1	0	0	0	1	0	0	1	1	1	0	1	0	0	0	5	0	5	7	30	0	4536	0	7.24	1.97962	120	4.78749	990	6.8977	10	2.30259	10	2.30259	30	3.4012	161.07	5.08184	1790.18	7.49007	30.9405	3.43207
104	29	0	2	1	0	0	0	0	1	0	0	0	1	0	1	0	0	1	0	0	2	2	0	0	2	2	0	32	0	2642	1	2.3	0.832909	230	5.43808	6880	8.83637	210	5.34711	150	5.01064	30	3.4012	81.5461	4.40117	1778.68	7.48363	11.9457	2.48037
105	20	0	2	1	0	0	0	0	1	0	0	0	0	0	0	0	0	2	1	1	1	3	1	5	1	7	5.8	34.1429	0	3615	0	5.39	1.68455	600	6.39693	11990	9.39183	950	6.85646	1340	7.20042	590	6.38012	13	2.56495	632.268	6.44931	17.4413	2.85884
106	31	1	1	0	0	0	0	1	1	0	1	0	1	0	0	0	1	1	0	4	2	6	0	20	2	22	7	34.8571	0	3496		2.62	0.963174	700	6.55108	8960	9.10053	290	5.66988	220	5.39363	30	3.4012	61.1	4.11251	804.9	6.69072	18.6	2.92316
107	19	0	1	0	0	0	0	0	1	0	0	0	0	0	0	0	0	1.79	0	0	0	0	0	0	0	0	0	33	0	3516	1	5.82	1.7613	60	4.09434	1910	7.55486	10	2.30259	10	2.30259	30	3.4012	181	5.1985	1278.59	7.15351	44.82	3.80265
109	30	0	2	1	0	0	0	0	0	0	1	0	0	1	0	1	0	1.43	0	0	0	0	0	0	0	0	0	29.4286	0	2595	0	6.83	1.92132	430	6.06379	9590	9.16848	490	6.19441	880	6.77992	730	6.59304	108.81	4.6896	458.79	6.12859	24.7	3.2068
110	18	0	2	1	0	0	0	0	1	0	0	0	0	0	0	1	0	1	0	0	0	0	0	0	0	0	0	30.7143	1	1060	0	3.06	1.11841	130	4.86753	2810	7.94094	10	2.30259	10	2.30259	30	3.4012	188.39	5.23851	1714.2	7.4467	21.44	3.06526
111	22	0	2	1	1	1	0	0	1	0	0	0	1	0	0	1	0	1	4	0	0	4	4	0	0	4	3	31.5714	0	3381	1	4.78	1.56444	310	5.73657	7660	8.94377	680	6.52209	650	6.47697	30	3.4012	9.25	2.22462	455.95	6.12238	18.6	2.92316
112	21	0	2	1	0	0	0	0	1	0	0	0	0	0	0	0	0	0.71	0	0	0	0	0	0	0	0	0	29	0	3119	0	11.99	2.48407	1900	7.54961	16410	9.70565	1880	7.53903	2800	7.93737	2670	7.88983	61.1	4.11251	903.92	6.80674	14.85	2.698
113	24	0	2	1	0	1	0	1	1	0	0	0	0	1	0	0	0	2.04	3	0	3	6	8	0	3	11	5	29	0	3153	0	2.02	0.703098	60	4.09434	5420	8.59785	10	2.30259	10	2.30259	30	3.4012	71.41	4.26844	850.79	6.74617	21.82	3.08283
114	20	0	1	0	0	0	0	0	1	0	0	0	1	0	1	1	0	2	6	0	0	6	6	0	0	6	3	30.2857	0	3045	1	5.46	1.69745	210	5.34711	3910	8.27129	150	5.01064	80	4.38203	30	3.4012	25.32	3.23159	502.51	6.21962	12.66	2.53845
115	21	0	2	1	1	0	0	0	1	0	0	0	1	1	0	1	0	3	4	0	4	8	7	0	9	16	3.44	29.8571	0	3536	1	2.49	0.912283	60	4.09434	1410	7.25134	10	2.30259	10	2.30259	30	3.4012	81.27	4.39778	1290.76	7.16299	30.12	3.40519
116	27	0	2	1	0	1	0	0	1	0	0	0	0	0	1	1	0	1.57	6	0	1	7	6	0	1	7	3	32.1429	0	3261	1	2.45	0.896088	380	5.94017	3700	8.21609	260	5.56068	100	4.60517	30	3.4012	38.42	3.64858	586.12	6.37352	12.66	2.53845
117	28	0	2	1	0	0	0	0	1	0	0	0	1	0	0	1	0	1	0	2	3	5	0	10	3	13	0	32.4286	0	2864	0	5.92	1.77834	390	5.96615	27460	10.2205	580	6.36303	740	6.60665	90	4.49981	38.42	3.64858	63.75	4.15497	17.27	2.84897
118	33	1	2	1	0	0	0	0	1	0	0	0	1	0	0	1	0	1	4	0	5	9	4	0	5	9	1.22	32	0	3799	1	2.71	0.996949	140	4.94164	3220	8.07714	30	3.4012	10	2.30259	30	3.4012	61.1	4.11251	964.06	6.87115	14.85	2.698
119	27	0	3	0	0	0	0	0	1	0	0	0	0	1	0	1	0	1.6	1	0	0	1	2	0	0	2	4	29.8571	0	2982	1	2.49	0.912283	60	4.09434	2430	7.79565	10	2.30259	10	2.30259	30	3.4012	50.18	3.91562	1869.55	7.53345	16.81	2.82197
120	32	1	1	0	0	0	0	0	1	0	0	0	1	0	0	0	0	1.32	4	0	5	9	4	0	18	22	3.5	38.1429	0	4593	1	4.53	1.51072	540	6.29157	28320	10.2513	610	6.41346	570	6.34564	30	3.4012	50.18	3.91562	443.84	6.09546	17.72	2.87469
121	20	0	1	0	0	0	0	0	0	0	0	0	0	0	1	1	0	1.57	1	0	11	12	2	0	17	19	3.5	36.2857	0	3235	1	2.38	0.8671	160	5.07517	4780	8.4722	10	2.30259	10	2.30259	30	3.4012	55.73	4.02052	649.59	6.47634	12.66	2.53845
122	27	0	2	1	0	0	0	0	1	0	0	0	1	0	0	0	1	1.54	8	1	1	10	9	5	2	16	5.2	37.7143	0	3768	0	11.11	2.40785	760	6.63332	23220	10.0528	2420	7.79152	2720	7.90839	1850	7.52294	117.48	4.76627	408.36	6.01215	22.57	3.11662
123	24	0	2	1	0	0	0	0	0	0	0	0	1	0	0	1	0	2.4	1	0	4	5	1	0	8	9	4	32.5714	0	3573	1	3.14	1.14422	230	5.43808	7830	8.96572	340	5.82895	290	5.66988	30	3.4012	81.27	4.39778	2074.93	7.63768	21.82	3.08283
124	24	0	2	1	0	0	0	0	0	0	0	0	0	0	0	0	0	1.5	0	1	0	1	0	5	0	5	0	31.1429	0	2901	1	5.29	1.66582	290	5.66988	8880	9.09156	510	6.23441	640	6.46147	380	5.94017	13	2.56495	1001.6	6.90935	9.36	2.23645
125	26	0	2	1	0	0	0	0	1	0	0	0	0	0	0	0	0	2.7	1	1	4	6	3	5	8	16	6.62	30.4286	0	2973	1	6.68	1.89912	440	6.08677	7590	8.93459	280	5.63479	480	6.17379	30	3.4012	25.32	3.23159	1112.13	7.01403	13.79	2.62394
126	28	0	2	1	0	0	0	1	1	0	0	1	1	0	0	0	1	2	0	0	0	0	0	0	0	0	0	28.2857	0	4375	1	3.99	1.38379	190	5.24702	7010	8.85509	10	2.30259	10	2.30259	30	3.4012	134.24	4.89963	2458.72	7.8074	17.72	2.87469
127	20	0	2	1	0	1	1	0	1	0	0	0	1	0	0	0	0	3	11	0	5	16	11	0	6	17	4.3	32.2857	0	2590	1	2.21	0.792993	230	5.43808	2390	7.77905	10	2.30259	10	2.30259	30	3.4012	108.81	4.6896	795.08	6.67844	18.6	2.92316
128	25	0	2	1	0	0	0	0	1	0	0	0	0	1	0	1	0	2.45	3	0	3	6	3	0	8	11	4	34	0	3693	1	11.14	2.41054	590	6.38012	21510	9.97627	890	6.79122	1560	7.35244	820	6.7093	38.42	3.64858	844.19	6.73838	19.02	2.94549
129	24	0	3	0	0	0	0	0	0	1	0	1	0	1	1	1	0	2	0	0	1	1	0	0	1	0	0	33.5714	0	2826	1	7.81	2.0554	250	5.52146	2520	7.83201	110	4.70048	10	2.30259	30	3.4012	38.42	3.64858	1428.28	7.26423	8.58	2.14943
130	32	1	1	0	0	1	0	0	1	0	0	0	1	0	0	1	0	1.34	13	2	6	21	27	10	16	53	6.63	31.7143	0	3232	0	5.31	1.66959	80	4.38203	3910	8.27129	140	4.94164	10	2.30259	30	3.4012	9.25	2.22462	230.51	5.44029	14.33	2.66236
131	29	0	2	1	0	0	0	0	0	0	0	0	0	0	0	1	0	1.16	1	0	0	1	1	0	0	1	3	36.2857	0	3416	1	14.24	2.65605	1970	7.58579	97430	11.4869	4560	8.42508	7190	8.88045	6990	8.85224	452.96	6.1158	685.19	6.5297	45.49	3.81749
132	28	0	2	1	0	0	0	0	1	1	0	1	0	0	0	1	0	1.36	0	0	3	3	0	0	3	3	0	30.5714	0	3360	0	1.16	0.14842	120	4.78749	2880	7.96555	60	4.09434	10	2.30259	30	3.4012	13	2.56495	732.99	6.59713	6.79	1.91545
133	40	1	2	1	0	0	0	0	1	0	0	0	1	0	1	0	0	2	0	1	5	6	0	5	6	11	7	36	0	3402	1	6.82	1.91986	380	5.94017	11020	9.30747	660	6.49224	830	6.72143	430	6.06379	117.48	4.76627	1479.92	7.29974	23.3	3.14845
134	31	1	1	0	0	0	0	0	1	0	0	0	0	0	1	0	0	1.75	2	2	2	6	4	10	2	16	6.54	37.7143	0	2976	1	3.69	1.30563	510	6.23441	10440	9.2534	320	5.76832	220	5.39363	30	3.4012	13	2.56495	866.76	6.76476	20.26	3.00865
135	34	1	1	0	0	0	0	0	1	0	0	0	0	0	0	1	0	2.38	0	4	0	4	0	20	0	20	7	37	0	3112	1	10.86	2.38509	860	6.75693	19950	9.90098	1120	7.02108	810	6.69703	30	3.4012	13	2.56495	506.98	6.22847	11.43	2.43624
136	23	0	2	1	0	0	0	0	0	0	0	0	0	0	1	1	1	1.04	0	0	2	2	0	0	4	4	0	32	0	3771	0	21.06	3.04738	1890	7.54433	37910	10.543	2490	7.82004	4520	8.41627	3620	8.19423	99.91	4.60427	268.72	5.59367	22.57	3.11662
137	27	0	2	1	0	1	0	0	0	0	0	0	1	0	1	0	1	3	15	2	1	18	27	10	1	38	5.35	36.8571	0	3091	0	6.29	1.83896	470	6.15273	17870	9.79088	1560	7.35244	1200	7.09008	1340	7.20042	13	2.56495	350.76	5.8601	11.43	2.43624
138	20	0	1	0	0	0	0	0	1	0	0	0	0	0	0	1	0	1	0	0	5	5	0	0	6	6	0	27.8571	0	3118	0	3.73	1.31641	270	5.59842	3220	8.07714	10	2.30259	10	2.30259	30	3.4012	13	2.56495	585.61	6.37265	8.58	2.14943
139	30	0	2	1	0	0	0	0	1	0	0	0	0	0	0	1	0	1.17	0	0	8	8	0	0	14	14	0	26.5714	0	2970	1	2.66	0.978326	200	5.29832	1460	7.28619	60	4.09434	10	2.30259	30	3.4012	13	2.56495	301.35	5.70827	3	1.09861
140	29	0	3	0	0	0	0	0	1	0	0	0	0	0	0	1	0	1.53	7	8	7	22	17	40	22	79	6.14	31.5714	0	3459	1	7.97	2.07568	420	6.04025	4300	8.36637	680	6.52209	920	6.82437	110	4.70048	13	2.56495	415.96	6.03059	22.57	3.11662
141	34	1	1	0	1	1	0	0	1	0	0	0	0	0	0	1	0	1	0	0	10	10	0	0	29	29	0	33.1429	0	3957	0	2.63	0.966984	320	5.76832	14440	9.57776	480	6.17379	610	6.41346	30	3.4012	13	2.56495	547.58	6.30551	8.58	2.14943
142	32	1	2	1	0	0	0	0	1	0	0	0	1	0	0	1	0	1.13	5	0	8	13	9	0	9	18	4.77	29.1429	0	3118	1	5.66	1.73342	190	5.24702	2350	7.76217	10	2.30259	10	2.30259	30	3.4012	38.42	3.64858	727.34	6.58939	14.85	2.698
143	37	1	1	0	0	0	0	0	1	0	0	0	0	0	0	0	1	1.75	0	2	5	7	0	10	10	20	7	35.8571	0	4026	1	7.29	1.9865	920	6.82437	27460	10.2205	1970	7.58579	2820	7.94449	1130	7.02997	13	2.56495	191.48	5.25478	10.09	2.31154
144	29	0	1	0	0	0	0	0	1	0	0	0	0	0	0	1	1	1.27	0	0	6	6	0	0	9	9	0	29.1429	0	3487	0	6.48	1.86872	100	4.60517	1690	7.43248	10	2.30259	10	2.30259	30	3.4012	13	2.56495	579.07	6.36142	12.66	2.53845
145	28	0	2	1	0	0	0	0	1	0	0	1	1	0	1	0	0	1.5	0	0	1	1	0	0	3	3	0	36.5714	0	3107	0	5.93	1.78002	580	6.36303	5690	8.64647	150	5.01064	10	2.30259	30	3.4012	81.27	4.39778	712.09	6.5682	11.43	2.43624
146	18	0	2	1	0	0	0	0	0	1	0	1	0	0	0	1	0	2	4	0	0	4	6	0	3	9	3	31.1429	0	3419	0	2.68	0.985817	250	5.52146	3940	8.27894	270	5.59842	220	5.39363	620	6.42972	13	2.56495	559.77	6.32753	3	1.09861
147	40	1	2	1	0	0	0	1	1	0	0	0	1	0	0	1	1	1.75	0	0	1	1	0	0	2	2	0	38	0	2866	1	3.27	1.18479	360	5.8861	6920	8.84217	550	6.30992	280	5.63479	150	5.01064	13	2.56495	765.93	6.64109	4.45	1.4929
148	24	0	3	0	0	1	0	0	0	0	0	0	1	0	1	0	0	0.5	0	0	0	0	0	0	0	0	0	30.8571	0	3000	0	5.57	1.7174	430	6.06379	6330	8.75306	1100	7.00307	1440	7.2724	1080	6.98472	13	2.56495	460.43	6.13216	10.09	2.31154
149	22	0	1	0	0	0	0	0	0	0	0	0	1	0	0	0	0	1	2	0	5	5	2	0	5	5	3	35.2857	0	3458	1	9.97	2.29958	580	6.36303	14940	9.6118	30	3.4012	10	2.30259	30	3.4012	50.18	3.91562	1084.83	6.98918	8.58	2.14943
150	32	1	2	1	0	0	0	0	0	0	1	0	1	1	0	1	1	2	0	0	2	2	0	0	3	3	3	35.2857	0	3827	1	1.46	0.378436	1040	6.94698	5160	8.54869	10	2.30259	10	2.30259	30	3.4012	104.39	4.64813	1502.36	7.31479	12.66	2.53845
151	28	0	1	0	1	0	0	0	1	0	0	0	1	0	0	0	1	0.5	0	0	3	3	0	0	12	12	0	35.7143	0	3040	1	4.05	1.39872	280	5.63479	17640	9.77792	10	2.30259	10	2.30259	30	3.4012	25.32	3.23159	1422.5	7.26017	12.06	2.48989
152	22	0	1	0	0	1	0	0	0	0	0	0	0	0	0	1	0	1.56	0	0	0	0	0	0	0	0	0	85.8571	0	2920	1	5.7	1.74047	650	6.47697	2530	7.83597	90	4.49981	10	2.30259	30	3.4012	13	2.56495	338.57	5.82473	6.79	1.91545
153	32	1	2	1	0	0	0	0	1	0	0	0	0	0	0	1	0	0.36	0	0	0	0	0	0	0	0	0	35.2857	0	3435	0	5.84	1.76473	370	5.9135	6530	8.78416	10	2.30259	10	2.30259	150	5.01064	13	2.56495	520.85	6.25546	3	1.09861
154	32	1	3	0	1	0	0	0	0	1	0	1	1	0	0	1	0	1.08	1	2	6	9	1	10	9	20	6.7	34.2857	0	3144	1	8.57	2.14827	100	4.60517	4120	8.32361	160	5.07517	200	5.29832	30	3.4012	13	2.56495	171.84	5.14656	12.66	2.53845
155	21	0	2	1	0	0	0	0	0	0	0	0	0	0	0	0	0	2	2	0	4	6	2	0	5	7	2.29	34.8571	1	1570	0	5.62	1.72633	260	5.56068	5440	8.60153	400	5.99146	570	6.34564	30	3.4012	13	2.56495	195.99	5.27806	3	1.09861
156	34	1	3	0	0	0	0	0	1	0	1	0	1	0	0	1	0	1	5	1	0	6	6	5	0	11	4.11	34.8571	0	3077		3.09	1.12817	150	5.01064	54300	10.9023	10	2.30259	10	2.30259	30	3.4012	25.32	3.23159	734.83	6.59964	10.09	2.31154
157	24	0	2	1	0	0	0	0	0	0	0	0	0	0	0	0	1	2	2	2	6	10	3	10	14	27	6.46	37.1429	0	3232	1	12.02	2.48657	1040	6.94698	19110	9.85797	1950	7.57558	3230	8.08024	2580	7.85554	13	2.56495	381.76	5.94479	15.85	2.76317
159	28	0	1	0	0	0	0	0	1	0	0	1	1	0	0	0	0	1.5	0	1	0	1	0	5	0	5	4.27	34.1429	0	3430	0	2.47	0.904218	60	4.09434	390	5.96615	10	2.30259	10	2.30259	30	3.4012	134.24	4.89963	1000.69	6.90845	24.7	3.2068
160	38	1	3	0	0	0	0	0	1	0	0	0	0	0	0	1	1	1	0	0	4	4	0	0	8	8	0	27.7143	0	2830	0	2.06	0.722706	170	5.1358	760	6.63332	10	2.30259	100	4.60517	30	3.4012	13	2.56495	374.6	5.92586	3	1.09861
161	32	1	1	0	0	0	0	0	1	0	0	0	0	0	0	0	0	1	2	0	0	2	2	0	0	2	4.5	32.4286	0	3580	1	0.27	-1.30933	60	4.09434	640	6.46147	10	2.30259	10	2.30259	30	3.4012	13	2.56495	293.68	5.68249	11.43	2.43624
162	20	0	2	1	0	0	0	0	1	0	0	0	1	0	0	1	0	1	0	0	13	13	0	0	17	17	0	33.5714	0	3275	1	3.54	1.26413	600	6.39693	3510	8.16337	1220	7.10661	2140	7.66856	2100	7.64969	13	2.56495	200.63	5.30146	4.45	1.4929
163	26	0	1	0	0	1	1	0	0	0	0	0	1	0	0	0	0	2	0	0	0	0	0	0	0	0	0	36.2857	0	3430	1	2.55	0.936093	200	5.29832	2290	7.73631	10	2.30259	10	2.30259	30	3.4012	38.42	3.64858	440.05	6.08689	4.45	1.4929
164	25	0	1	0	0	0	0	0	0	0	0	0	0	0	1	1	0	2	2	1	7	10	6	5	11	22	3.69	27.1429	0	3020	0	3.04	1.11186	180	5.19296	1000	6.90776	10	2.30259	10	2.30259	30	3.4012	13	2.56495	489.7	6.19379	4.45	1.4929
165	32	1	1	0	0	0	0	0	1	0	0	1	0	1	1	0	0	0.5	3	0	16	19	6	0	45	51	4.6	34.7143	1			2.7	0.993252	490	6.19441	3130	8.04879	960	6.86693	1320	7.18539	980	6.88755	71.41	4.26844	375.08	5.92714	18.6	2.92316
166	35	1	2	1	0	0	0	0	1	0	0	0	0	0	0	0	1	1.05	8	2	1	11	8	10	1	19	4.69	35.4286	0	3246	1	2.28	0.824175	230	5.43808	1740	7.46164	10	2.30259	10	2.30259	30	3.4012	99.91	4.60427	1486.1	7.30391	21.05	3.0469
168	29	0	3	0	0	1	0	0	1	0	0	0	0	0	0	0	1	0	1	0	0	1	1	0	0	1	4	29	0	3076	1	2.2	0.788457	170	5.1358	1490	7.30653	10	2.30259	10	2.30259	30	3.4012	13	2.56495	388.69	5.96278	4.45	1.4929
169	32	1	1	0	0	0	0	0	1	1	0	1	0	0	0	0	0	1.14	3	0	11	14	6	0	26	32	4.5	39.7143	0	3543	0	2.59	0.951658	120	4.78749	1150	7.04752	10	2.30259	10	2.30259	30	3.4012	50.18	3.91562	586.32	6.37387	26.71	3.28504
170	31	1	1	0	0	0	0	0	1	0	0	0	0	0	0	0	1	1	0	0	2	2	0	0	2	2	3	26.7143	0	3329	1	1.85	0.615186	60	4.09434	430	6.06379	10	2.30259	10	2.30259	30	3.4012	108.81	4.6896	1078.84	6.98364	43.7	3.77735
171	28	0	2	1	0	1	0	0	1	0	0	0	0	0	0	1	0	2.7	9	2	5	16	17	10	9	36	8.53	28.1429	0	3320	0	2.42	0.883768	310	5.73657	1250	7.1309	410	6.01616	1070	6.97541	750	6.62007	13	2.56495	210.55	5.34972	4.45	1.4929
172	26	0	2	1	0	0	0	0	1	0	0	0	0	1	0	0	0	2.57	1	0	1	2	1	0	1	2	3	33.7143	0	3090	1	1.12	0.113329	60	4.09434	230	5.43808	10	2.30259	10	2.30259	30	3.4012	71.41	4.26844	853.4	6.74923	8.58	2.14943
173	20	0	1	0	0	0	0	0	0	0	0	0	0	0	0	0	1	2	0	0	0	0	0	0	0	0	0	38.7143	0	3954	1	1.16	0.14842	60	4.09434	230	5.43808	10	2.30259	10	2.30259	30	3.4012	25.32	3.23159	519.08	6.25206	3	1.09861
174	32	1	3	0	1	0	0	0	0	0	0	0	1	0	0	0	0	2	2	1	1	4	4	5	2	11	4.77	35	0	3595	0	0.95	-0.0512933	60	4.09434	520	6.25383	10	2.30259	10	2.30259	30	3.4012	50.18	3.91562	1234.8	7.11866	38.48	3.65014
175	31	1	2	1	0	0	0	0	0	0	0	0	0	1	0	1	1	1	3	0	0	3	3	0	0	3	2.33	35	0	3572	1	1.32	0.277632	60	4.09434	1050	6.95655	10	2.30259	10	2.30259	30	3.4012	290.49	5.67157	2031.57	7.61656	24.05	3.18013
176	37	1	1	0	1	0	0	0	1	0	0	0	0	0	0	1	0	1.32	2	3	2	7	3	15	7	25	6.55	34.7143	0	2545	1	2.32	0.841567	190	5.24702	980	6.88755	10	2.30259	10	2.30259	30	3.4012	200.48	5.30071	2000.47	7.60114	24.54	3.2003
177	20	0	1	0	0	0	0	0	1	0	0	1	1	1	0	0	0	1.5	0	0	2	2	0	0	3	3	0	35	0	2730	1	1.85	0.615186	60	4.09434	1070	6.97541	10	2.30259	10	2.30259	30	3.4012	200.48	5.30071	997.27	6.90502	25.24	3.22843
178	34	1	1	0	0	1	0	1	1	0	0	0	0	0	0	0	1	1	0	0	1	1	0	0	2	2	0	37.4286	0	3153	0	2.34	0.850151	180	5.19296	1320	7.18539	140	4.94164	50	3.91202	30	3.4012	133.78	4.8962	697.86	6.54802	12.36	2.51447
179	21	0	3	0	1	0	0	0	1	0	0	0	0	0	0	0	0	2	0	0	2	2	0	0	2	2	0	33.1429	0	3711		0.56	-0.579818	60	4.09434	430	6.06379	10	2.30259	10	2.30259	30	3.4012	89.02	4.48886	163.53	5.097	9.88	2.29051
180	32	1	2	1	0	0	0	0	1	0	0	0	0	0	0	1	0	1	1	2	5	8	1	10	6	17	6.8	37.5714	0	3650		1.05	0.0487902	70	4.2485	1220	7.10661	10	2.30259	10	2.30259	30	3.4012	89.02	4.48886	570.08	6.34578	13.11	2.57338
181	35	1	3	0	0	0	0	0	0	0	0	0	0	0	0	0	0	2	2	3	5	10	2	15	8	25	5.85		0	3572	1	0.27	-1.30933	60	4.09434	230	5.43808	10	2.30259	380	5.94017	160	5.07517	89.02	4.48886	28.54	3.35131	9.88	2.29051
182	27	0	2	1	0	0	0	0	1	0	0	0	0	0	0	1	0	2	0	0	4	4	0	0	7	7	0		0	3345	1	0.88	-0.127833	120	4.78749	230	5.43808	10	2.30259	530	6.27288	290	5.66988	89.02	4.48886	163.82	5.09877	9.88	2.29051
183	25	0	1	0	0	0	0	0	0	0	0	0	1	0	0	1	0	1	1	0	6	7	1	0	11	12	3	26.8571	0	3000	0	1.62	0.482426	60	4.09434	230	5.43808	10	2.30259	10	2.30259	30	3.4012	76.45	4.33664	66.49	4.19705	10.76	2.37584
184	22	0	2	1	0	0	0	0	1	0	0	0	1	0	0	0	0	1.75	1	0	0	1	1	0	0	1	4	30.4286	0	3200	0	1.79	0.582216	60	4.09434	360	5.8861	10	2.30259	10	2.30259	30	3.4012	100.92	4.61433	202.05	5.30852	11.58	2.44928
185	22	0	1	0	0	1	0	0	1	0	1	0	0	0	0	1	1	2	1	0	6	7	1	0	8	9	2.1	28.2857	0	2950	1	1.86	0.620576	60	4.09434	230	5.43808	10	2.30259	10	2.30259	30	3.4012	100.92	4.61433	197.6	5.28624	13.83	2.62684
186	37	1	1	0	0	0	0	0	1	0	0	0	0	0	0	1	1	0.78	0	1	12	13	0	5	41	46	0	28.8571	0	3572	1	1.36	0.307485	60	4.09434	230	5.43808	10	2.30259	10	2.30259	30	3.4012	123.22	4.81397	429.96	6.06369	15.19	2.72064
[truncated: 82 more columns]

## Sheet: Code book
	SubjectNumber	Mother_ID
	Age	Numerical
	Age>30	>30-1, <30-0
	Race	Caucasian-1, Black-2, Other-3
	Race_Black	Y-1, N-0
	Hispanic	Y-1, N-0
	YeastInfection	Y-1, N-0
	Antibiotics	Y-1, N-0
	Antifungal	Y-1, N-0
	BrushTwiceDaily	Y-1, N-0
	Prenatal_Inhaler	Y-1, N-0
	Prenatal_Diabetes	Y-1, N-0
	Prenatal_Asthma	Y-1, N-0
	Prenatal_Emotionalcondition	Y-1, N-0
	Prenatal_HTN	Y-1, N-0
	Prenatal_Smoking	Y-1, N-0
	Employed	Y-1, N-0
	Education	1-middle school; 2-high school; 3- associate; 4-college or higher
	Modified_Education	1_middle school and high school; 2_Associate degree, 3_college and higher education
	Married	Y-1, N-0
	Number_Children	Numerical
	PI	Numerical
	PI_Cutoff2	<2-1, >=2-2
	DT	Numerical
	MT	Numerical
	FT	Numerical
	DMFT	Numerical
	DS	Numerical
	MS	Numerical
	FS	Numerical
	DMFS	Numerical
	ICDAS	Numerical	ICDAS scores ratio 0-6
	DMFT_cut off7	1-6=1 | >=7-2
	ICDAS_cut_off_3	1-2=1 | >=3-2
	DT_cut_off_4	1-3=1 | >=4-2
	Gestational age at V1	Numerical
	AdverseBirthOutcome	Y-1, N-0
	Preterm	Y-1, N-0
	Lowbrithweight	Y-1, N-0
	InfantBirthweight	Numerical
	Depression_score>12	Include pre and post Y-1, N-0
	Postpartum_Depression	Y-1, N-0
	Cortisol	Numerical	Hormones pg/ml
	Cortisol LN	Numerical
	Estradiol	Numerical
	Estradiol LN	Numerical
	Progesterone	Numerical
	Progesterone LN	Numerical
	Testosterone	Numerical
	Testosterone LN	Numerical
	T3	Numerical
	T3 LN	Numerical
	T4	Numerical
	T4 LN	Numerical
	sCD40L	Numerical	Immune markers pg/ml
	sCD40L LN	Numerical
	EGF	Numerical
	EGF LN	Numerical
	Eotaxin	Numerical
	Eotaxin LN	Numerical
	FGF-2	Numerical
	FGF-2 LN	Numerical
	FLT-3L	Numerical
	FLT-3L LN	Numerical
	Fractalkine	Numerical
	Fractalkine LN	Numerical
	G-CSF	Numerical
	G-CSF LN	Numerical
	GRO-a	Numerical
	GRO-a LN	Numerical
	IFN-a2	Numerical
	IFN-a2 LN	Numerical
	IFN-g	Numerical
	IFN-g LN	Numerical
	IL-1a	Numerical
	IL-1a LN	Numerical
	IL1-b	Numerical
	IL1-b LN	Numerical
	IL-1ra	Numerical
	IL-1ra LN	Numerical
	IL-2	Numerical
	IL-2 LN	Numerical
	IL-4	Numerical
	IL-4 LN	Numerical
	IL-5	Numerical
	IL-5 LN	Numerical
	IL-6	Numerical
	IL-6 LN	Numerical
	IL-8	Numerical
	IL-8 LN	Numerical
	IL-9	Numerical
	IL-9 LN	Numerical
	IL-10	Numerical
	IL-10 LN	Numerical
	IL-12p40	Numerical
	IL-12p40 LN	Numerical
	IL-12p70	Numerical
	IL-12p70 LN	Numerical
	IL-13	Numerical
	IL-13 LN	Numerical
	IL-15	Numerical
	IL-15 LN	Numerical
	IL-17a	Numerical
	IL-17a LN	Numerical
	IL-18	Numerical
	IL-18 LN	Numerical
	IP-10	Numerical
	IP-10 LN	Numerical
	MCP-1	Numerical
	MCP-1 LN	Numerical
	MCP-3	Numerical
	MCP-3 LN	Numerical
	MDC	Numerical
	MDC LN	Numerical
	MIP-1b	Numerical
	MIP-1b LN	Numerical
	RANTES	Numerical
	RANTES LN	Numerical
	TGF-a	Numerical
	TGF-a LN	Numerical
	TNF-a	Numerical
	TNF-a LN	Numerical
	TNF-b	Numerical
	TNF-b LN	Numerical
	VEGF-a	Numerical
	VEGF-a LN	Numerical
	Saliva C. albicans (CFU/ml)	Numerical
	Saliva C. albicans Ln (CFU/ml)	Numerical
	Saliva S.mutans (CFU/ml)	Numerical
	Saliva S.mutans Ln (CFU/ml)	Numerical
	Plaque C. albicans (CFU/ml)	Numerical
	Plaque C. albicans Ln	Numerical
	Plaque S.mutans (CFU/ml)	Numerical
	Plaque S.mutans Ln	Numerical
	Saliva Candida scale (0-1, 1-400-2, >400-3)	0-1, 1-400-2, >400-3
	Saliva S. mutans scale (0-1,1-E5-2, >E5-3)	0-1,1-E5-2, >E5-3
	Saliva Candida (Y-1, N-0)	Y-1, N-0
	Saliva S.mutans (Y-1, N-0)	Y-1, N-0
	Saliva Candida Cutoff(>400,1, N-0)	>400,1, N-0
	Saliva S.mutans Cutoff(>10-5,1, N-0)	>10-5,1, N-0
	Plaque Candida (Y-1, N-0)	Y-1, N-0
	Plaque S.mutans (Y-1, N-0)	Y-1, N-0
